# Supplementary material for: Fates of secondary organic aerosols in the atmosphere identified from compound-specific dual-carbon isotope analysis of oxalic acid
Source: Copernicus journal article supplement (doi:10.5194/acp-2022-707), 2022-11-01
Supplement: Supplementary file 1 [file acp-2022-707-supplement.pdf]

**Supporting information for:**

**Fates of secondary organic aerosols in the atmosphere identified from  
compound-specific dual-carbon isotope analysis of oxalic acid**

Buqing Xu<sup>1,2</sup>, Jiao Tang<sup>1,2</sup>, Tiangang Tang<sup>1,3</sup>, Shizhen Zhao<sup>1,2</sup>, Guangcai Zhong<sup>1,2</sup>,  
Sanyuan Zhu<sup>1,2</sup>, Jun Li<sup>1,2</sup>, Gan Zhang<sup>1,2\*</sup>

<sup>1</sup>State Key Laboratory of Organic Geochemistry, Guangzhou Institute of Geochemistry,  
Chinese Academy of Sciences, Guangzhou 510640, China.

<sup>2</sup>CAS Center for Excellence in Deep Earth Science, Guangzhou 510640, China

<sup>3</sup>Key Laboratory of Agro-ecological Processes in Subtropical Region, Institute of  
Subtropical Agriculture, Chinese Academy of Sciences, Changsha, 410125, China.

\*Correspondence: Gan Zhang ([zhanggan@gig.ac.cn](mailto:zhanggan@gig.ac.cn))

**This PDF file includes:**

- 1. Supplementary Figure (Figure 1–4)**
- 2. Supplementary Table (Table 1–5)**

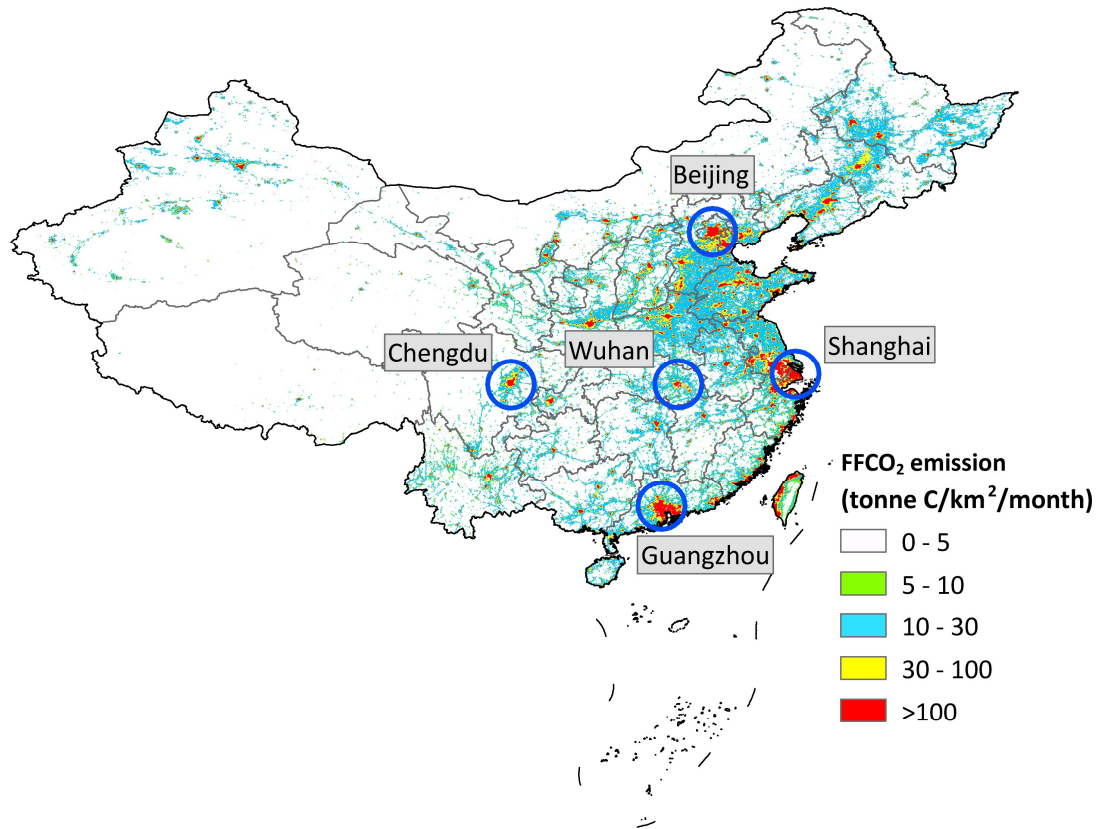

**Figure S1.** Locations of the five megacities (Beijing, Chengdu, Guangzhou, Shanghai, and Wuhan) and average fossil fuel CO<sub>2</sub> (FF CO<sub>2</sub>) emissions during the year 2018. FF CO<sub>2</sub> emissions indicating high levels of anthropogenic activities over the five megacities. The FF CO<sub>2</sub> emission data is obtained from Open-source Data Inventory for Anthropogenic CO<sub>2</sub> ([https://db.cger.nies.go.jp/dataset/ODIAC/DL\\_odiac2020b.html](https://db.cger.nies.go.jp/dataset/ODIAC/DL_odiac2020b.html)). The administration boundaries in the map are originated from map products of National Geomatics Center of China (<https://www.webmap.cn/>).

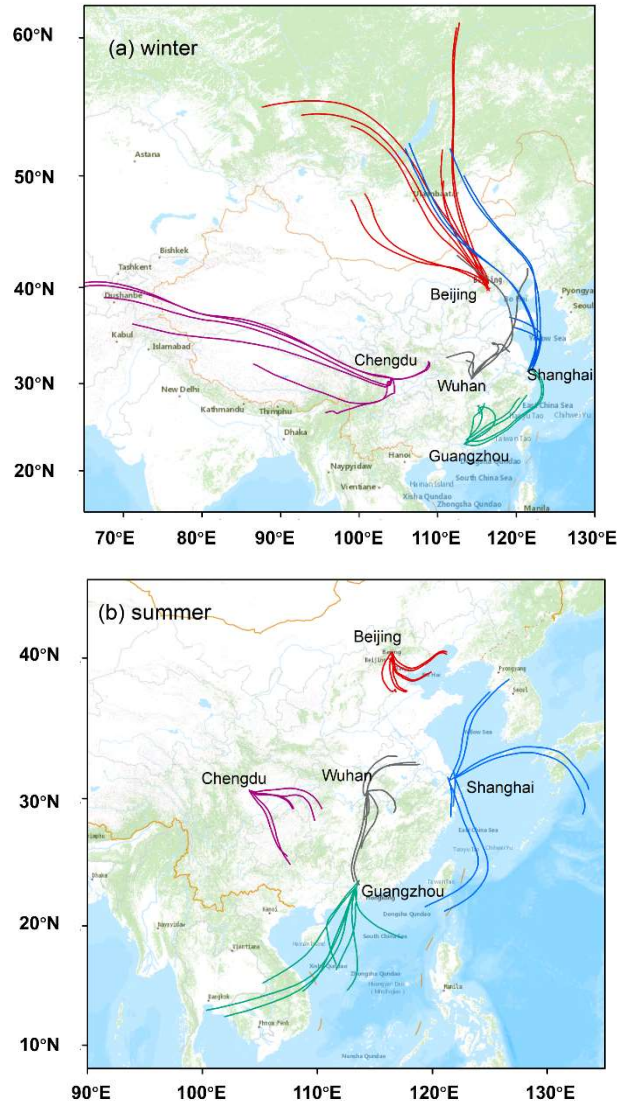

**Figure S2.** Cluster analysis of 3-day air mass backward trajectories computed at an altitude of 100 m for the sampling sites in Beijing, Shanghai, Guangzhou, Wuhan, and Chengdu during January 2018 (a) and July 2018 (b). The maps are originated from ArcGIS [hub free map data \(https://hub.arcgis.com/maps/0c539fdb47d34b17bd1452f6b9f49e97/explore?location=17.762116%2C-74.005269%2C3.65\)](https://hub.arcgis.com/maps/0c539fdb47d34b17bd1452f6b9f49e97/explore?location=17.762116%2C-74.005269%2C3.65).

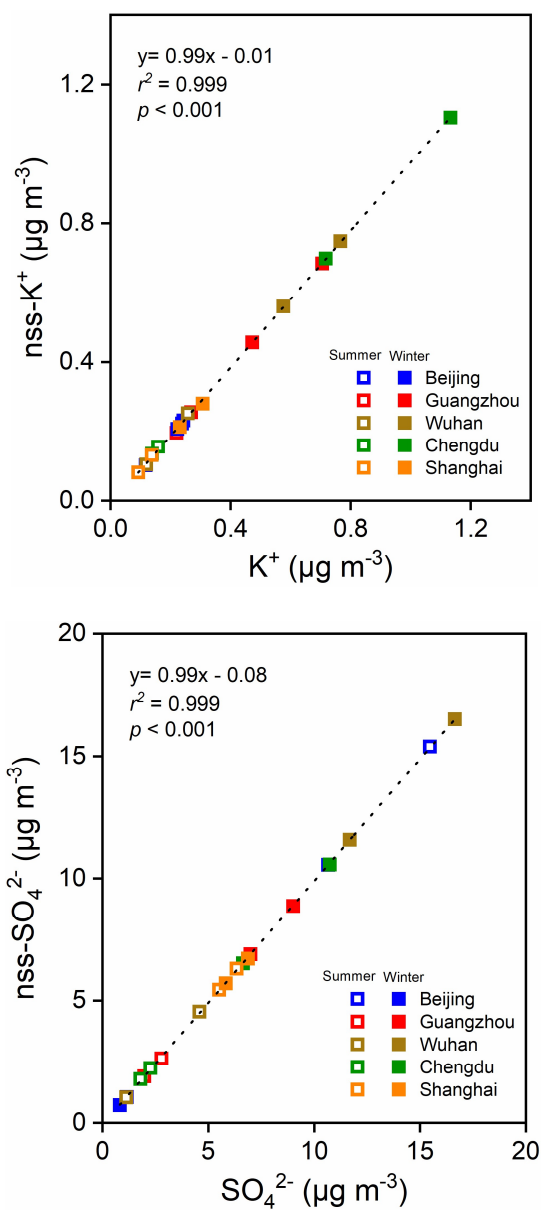

**Figure S3.** Ratios of non-sea-salt potassium ( $nss-K^+$ ) to total  $K^+$  and non-sea-salt sulfate ( $nss-SO_4^{2-}$ ) to total  $SO_4^{2-}$ .

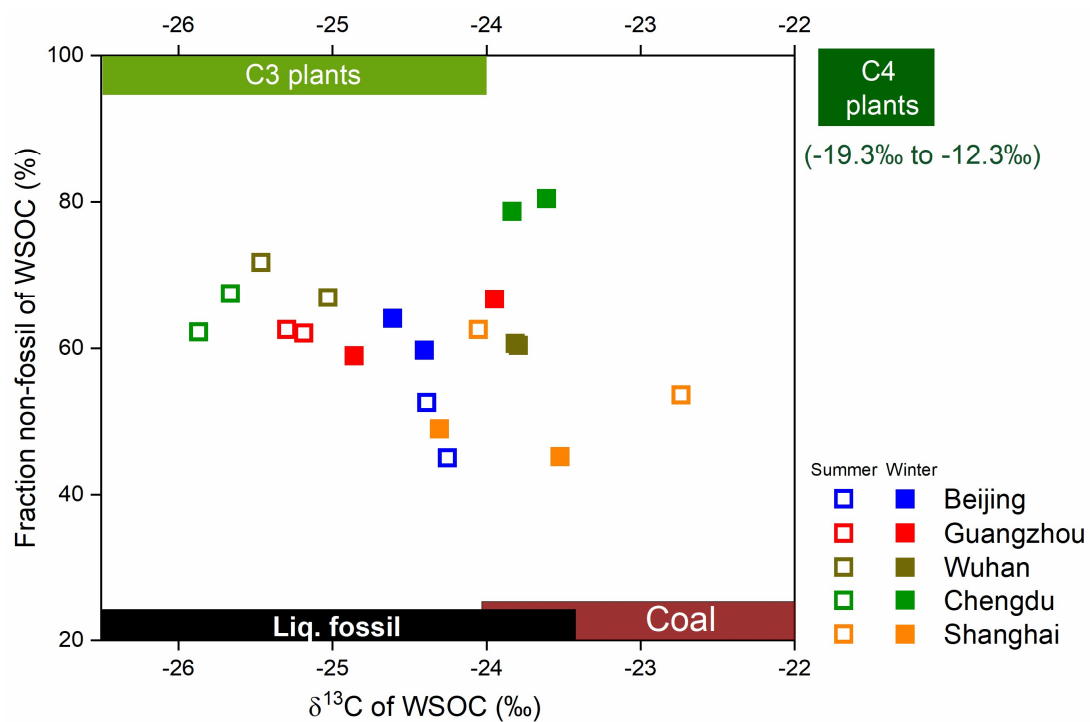

**Figure S4.**  $^{14}\text{C}$ -based non-fossil source fractions plotted against the  $\delta^{13}\text{C}$  values for water-soluble organic carbon (WSOC) in  $\text{PM}_{2.5}$  collected in Beijing (blue), Guangzhou (red), Wuhan (brown), Chengdu (green), and Shanghai (orange) in summer (open squares) and winter (filled squares).

**Table S1.** Information on sampling sites and deployment periods.

| City      | Site attribution | Location            | Cycle starts in winter | Cycle ends in winter | Cycle starts in summer | Cycle ends in summer |
|-----------|------------------|---------------------|------------------------|----------------------|------------------------|----------------------|
| Beijing   | Urban            | 39.974°N, 116.370°E | 2018/1/5               | 2018/1/12            | 2018/7/28              | 2018/8/3             |
|           | Suburban         | 40.408°N, 116.674°E | 2018/1/5               | 2018/1/12            | 2018/7/28              | 2018/8/3             |
| Shanghai  | Urban            | 31.316°N, 121.423°E | 2018/1/19              | 2018/1/25            | 2018/7/28              | 2018/8/3             |
|           | Suburban         | 31.524°N, 121.959°E | 2018/1/18              | 2018/1/24            | 2018/7/28              | 2018/8/3             |
| Guangzhou | Urban            | 23.149°N, 113.358°E | 2018/1/18              | 2018/1/24            | 2018/6/29              | 2018/7/5             |
|           | Suburban         | 23.650°N, 113.624°E | 2018/1/18              | 2018/1/24            | 2018/6/29              | 2018/7/5             |
| Wuhan     | Urban            | 30.531°N, 114.308°E | 2018/1/19              | 2018/1/25            | 2018/7/28              | 2018/8/3             |
|           | Suburban         | 30.531°N, 114.332°E | 2018/1/18              | 2018/1/24            | 2018/7/28              | 2018/8/3             |
| Chengdu   | Urban            | 30.629°N, 104.064°E | 2018/1/18              | 2018/1/24            | 2018/7/28              | 2018/8/3             |
|           | Suburban         | 30.563°N, 104.272°E | 2018/1/18              | 2018/1/24            | 2018/7/28              | 2018/8/3             |

**Table S2.** Mass concentration of dicarboxylic acids, oxocarboxylic acids, and  $\alpha$ -dicarbonyls in PM<sub>2.5</sub> samples from the five hot spot emission locations of China.

|                                                                | Summer (N = 10) |             | Winter (N = 10) |             |
|----------------------------------------------------------------|-----------------|-------------|-----------------|-------------|
|                                                                | Range           | Mean/SD     | Range           | Mean/SD     |
| <b>I. Dicarboxylic Acids, ng m<sup>-3</sup></b>                |                 |             |                 |             |
| Oxalic, C <sub>2</sub>                                         | 59.2-713.3      | 412.8±201.5 | 19.2-1077.9     | 740.1±324.4 |
| Malonic, C <sub>3</sub>                                        | 3.1-44.7        | 30.5±12.2   | 0.8-53          | 26.8±16     |
| Succinic, C <sub>4</sub>                                       | 3.1-44.5        | 25.4±11.9   | 1.6-66          | 39.5±21.3   |
| Glutaric, C <sub>5</sub>                                       | 0.6-9.7         | 4.9±2.7     | 0.3-18.9        | 10.7±6      |
| Adipic, C <sub>6</sub>                                         | 0.5-5           | 2.9±1.5     | 0.2-8.7         | 4.8±2.5     |
| Pimelic, C <sub>7</sub>                                        | 0.2-2.5         | 1.3±0.8     | 0-5.2           | 2.3±1.5     |
| Suberic, C <sub>8</sub>                                        | 0.4-5.2         | 2.6±1.6     | 0.1-7.7         | 3.2±2.2     |
| Azelaic, C <sub>9</sub>                                        | 0.7-31.3        | 11.4±9      | 0.3-21.4        | 8.6±6.2     |
| Sebacic, C <sub>10</sub>                                       | 0.1-1.6         | 0.8±0.4     | 0-3.3           | 1.3±1.1     |
| Undecanedioic, C <sub>11</sub>                                 | 0.1-1.9         | 0.6±0.5     | 0-1.9           | 0.7±0.6     |
| Dodecanedioic, C <sub>12</sub>                                 | 0-0.4           | 0.2±0.1     | 0-0.7           | 0.3±0.2     |
| Methylmalonic, iC <sub>4</sub>                                 | 0.1-0.9         | 0.7±0.3     | 0-1.1           | 0.6±0.3     |
| Methylsuccinic, iC <sub>5</sub>                                | 0.3-2.7         | 1.8±0.8     | 0.3-7.1         | 4.1±2.5     |
| 2-Methylglutaric, iC <sub>6</sub>                              | 0.1-0.9         | 0.5±0.3     | 0.1-1.7         | 1±0.6       |
| Maleic, M                                                      | 0.2-3.8         | 1.5±1       | 0.1-4.1         | 2±1.2       |
| Fumaric, F                                                     | 0.2-1.7         | 1±0.4       | 0.1-1.5         | 0.8±0.4     |
| Methylmaleic, Mm                                               | 0.4-4           | 2.9±1.2     | 0.3-7.6         | 3.7±2       |
| Phthalic, Ph                                                   | 2.1-25.4        | 10.2±7.1    | 1.3-17.7        | 6±5         |
| Isophthalic, iph                                               | 0-0.4           | 0.2±0.1     | 0-0.7           | 0.2±0.2     |
| Terephthalic, tPh                                              | 0.6-11.2        | 5.7±4       | 0.4-18.1        | 6.6±5.6     |
| 4-Ketopimelic, kC <sub>7</sub>                                 | 0.2-8.5         | 4±2.6       | 0-6.7           | 1.9±2       |
| Total diacids                                                  | 75.5-871        | 521.8±233.8 | 25.4-1269.2     | 865.2±384.5 |
| <b>II. Oxocarboxylic Acids, ng m<sup>-3</sup></b>              |                 |             |                 |             |
| Pyruvic, Pyr                                                   | 0.4-10          | 6.4±2.8     | 0.2-23.4        | 9.3±7.3     |
| Glyoxylic, $\omega$ C <sub>2</sub>                             | 2.5-27.1        | 18.2±7.4    | 2.1-69.3        | 41.1±20.8   |
| 3-Oxopropanoic, $\omega$ C <sub>3</sub>                        | 0.5-5.1         | 3.4±1.4     | 0.4-2.7         | 1.6±0.7     |
| 4-Oxobutanoic, $\omega$ C <sub>4</sub>                         | 0.5-5.6         | 3.6±1.6     | 0.4-4.4         | 2.1±1.1     |
| 5-Oxopentanoic, $\omega$ C <sub>5</sub>                        | 0-11.9          | 1.9±3.8     | 0-29.7          | 14.9±10.6   |
| 6-Oxoheptanoic, $\omega$ C <sub>6</sub>                        | 0-4.6           | 2.5±1.4     | 0-5.5           | 3.1±1.9     |
| Total oxoacids                                                 | 3.9-55.9        | 36±15.1     | 3.1-113.1       | 72±37.9     |
| <b>III. <math>\alpha</math>-Dicarbonyls, ng m<sup>-3</sup></b> |                 |             |                 |             |
| Glyoxal, Gly                                                   | 0.1-15.2        | 3.7±5       | 0.1-27          | 7.7±8.4     |
| Methylglyoxal, mGly                                            | 11.2-72.2       | 33.3±20.8   | 12.2-89.7       | 56.6±28.7   |
| Total dicarbonyls                                              | 11.2-87.4       | 37±25.5     | 12.3-111.1      | 64.3±35.8   |

**Table S3.** The mass concentration, stable carbon composition ( $\delta^{13}\text{C}$ , ‰), and  $^{14}\text{C}$ -based source apportionment (fraction of non-fossil;  $f_{NF}$ ) of oxalic acid in the  $\text{PM}_{2.5}$  samples from the five hot spot emission locations of China.

| City      | Season | Site attribute | Concentration<br>( $\text{ng m}^{-3}$ ) | $\delta^{13}\text{C}$ (‰) | $f_{NF}$ (%)   |
|-----------|--------|----------------|-----------------------------------------|---------------------------|----------------|
| Guangzhou | Summer | Suburban       | 491.3                                   | $-22.8 \pm 0.5$           | $75.7 \pm 1.7$ |
|           |        | Urban          | 502.0                                   | $-23.2 \pm 0.2$           | $72.7 \pm 2.4$ |
|           | Winter | Suburban       | 888.4                                   | $-26.7 \pm 0.6$           | $63.6 \pm 1.2$ |
|           |        | Urban          | 571.2                                   | $-27.5 \pm 0.4$           | $63.7 \pm 1.5$ |
| Beijing   | Summer | Suburban       | 705.0                                   | $-22 \pm 1.0$             | $57.5 \pm 1.4$ |
|           |        | Urban          | 713.3                                   | $-23.7 \pm 0.1$           | $43.5 \pm 1.3$ |
|           | Winter | Suburban       | 19.2                                    | $-22 \pm 1.1$             | nd             |
|           |        | Urban          | 424.5                                   | $-29.7 \pm 1.4$           | $44.1 \pm 4.9$ |
| Wuhan     | Summer | Suburban       | 59.2                                    | $-22.3 \pm 0.1$           | nd             |
|           |        | Urban          | 302.1                                   | $-22.6 \pm 0.2$           | $73.1 \pm 4.4$ |
|           | Winter | Suburban       | 732.4                                   | $-27 \pm 0.4$             | $64.6 \pm 1.4$ |
|           |        | Urban          | 1077.9                                  | $-27.2 \pm 0.6$           | $59.6 \pm 1.4$ |
| Chengdu   | Summer | Suburban       | 262.7                                   | $-23.5 \pm 0.6$           | $71.4 \pm 5.0$ |
|           |        | Urban          | 316.8                                   | $-25.1 \pm 0.9$           | $62.8 \pm 4.5$ |
|           | Winter | Suburban       | 1038.6                                  | $-26.9 \pm 0.7$           | $63.1 \pm 1.3$ |
|           |        | Urban          | 972.1                                   | $-26.6 \pm 1.2$           | $59.3 \pm 1.0$ |
| Shanghai  | Summer | Suburban       | 335.5                                   | $-14.1 \pm 0.1$           | $66 \pm 1.8$   |
|           |        | Urban          | 439.6                                   | $-18.6 \pm 0.2$           | $71.6 \pm 1.6$ |
|           | Winter | Suburban       | 817.0                                   | $-23.7 \pm 0.1$           | $41.5 \pm 0.5$ |
|           |        | Urban          | 859.5                                   | $-24.7 \pm 1.0$           | $39.6 \pm 1.2$ |

<sup>a</sup> nd: non data



**Table S4.** Compound-specific stable carbon isotope ratios ( $\delta^{13}\text{C}$ , ‰) of dicarboxylic acid and oxocarboxylic acid in  $\text{PM}_{2.5}$  samples from the five hot spot emission locations of China.

|                               | Summer (N = 10) |           | Winter (N=10)  |           |
|-------------------------------|-----------------|-----------|----------------|-----------|
|                               | Range           | Mean/SD   | Range          | Mean/SD   |
| I. Dicarboxylic Acids         |                 |           |                |           |
| Oxalic, $\text{C}_2$          | -25.1 to -14.1  | -21.8±3.2 | -29.7 to -22.0 | -26.2±2.2 |
| Malonic, $\text{C}_3$         | -24.9 to -18.4  | -21.7±1.8 | -26.7 to -20.7 | -23.2±2.1 |
| Succinic, $\text{C}_4$        | -28.6 to -20.7  | -24.4±2.1 | -27.6 to -23.0 | -24.2±1.5 |
| Azelaic, $\text{C}_9$         | -29.8 to -26.7  | -28.1±0.8 | -32.5 to -26.2 | -29±1.7   |
| Phthalic, Ph                  | -31.7 to -27.8  | -29.4±1.3 | -37.1 to -26.0 | -30.5±3.5 |
| II. Oxocarboxylic Acid        |                 |           |                |           |
| Glyoxylic, $\omega\text{C}_2$ | -39.8 to -19.3  | -32.5±5.4 | -45.9 to -30.1 | -37.2±4.9 |

**Table S5.** The concentrations of major chemical components in PM<sub>2.5</sub> samples from the five hot spot emission locations of China.

|                                                          | Summer (N = 10) |           | Winter (N = 10) |           |
|----------------------------------------------------------|-----------------|-----------|-----------------|-----------|
|                                                          | Range           | Mean/SD   | Range           | Mean/SD   |
| PM <sub>2.5</sub> , $\mu\text{g m}^{-3}$                 | 32.2-163.7      | 80.5±44.3 | 2.4-137.8       | 92.2±44.7 |
| WSOC, $\mu\text{g m}^{-3}$                               | 1.1-3.8         | 2.2±0.8   | 1.1-9.6         | 4.1±2.5   |
| NO <sub>3</sub> <sup>-</sup> , $\mu\text{g m}^{-3}$      | 0.9-7.9         | 3.2±2.5   | 1.4-62.7        | 26.3±20.1 |
| nss-SO <sub>4</sub> <sup>2-</sup> , $\mu\text{g m}^{-3}$ | 1.1-15.5        | 5.3±4.6   | 0.8-16.6        | 7.6±4.7   |
| NH <sub>4</sub> <sup>+</sup> , $\mu\text{g m}^{-3}$      | 0.5-8.2         | 3.0±2.8   | 0.7-16.9        | 7.6±5.2   |
| nss-K <sup>+</sup> , $\mu\text{g m}^{-3}$                | 0.1-0.3         | 0.2±0.1   | 0.1-1.1         | 0.5±0.3   |
| WSIC <sub>anth</sub> <sup>a</sup> , $\mu\text{g m}^{-3}$ | 2.5-31.5        | 11.7±9.6  | 3.5-100.4       | 43.5±30.9 |
| ALWC <sup>b</sup> , $\mu\text{g m}^{-3}$                 | 2.6-19.4        | 8.5±5.1   | 1.4-229.8       | 59.7±76.1 |

<sup>a</sup> anthropogenic water-soluble inorganic constituents (WSIC<sub>anth</sub>) = non-sea-salt (nss) K<sup>+</sup> + nss-SO<sub>4</sub><sup>2-</sup> + NH<sub>4</sub><sup>+</sup> + NO<sub>3</sub><sup>-</sup> + nss-Cl<sup>-</sup> <sup>b</sup> aerosol liquid water content
